# Supplementary material for: Enhanced Bandwidth Broadening of Infrared Reflector Based on Polymer Stabilized Cholesteric Liquid Crystals with Poly(N-vinylcarbazole) Used as Alignment Layer
Source: MDPI journal article supplement (doi:10.3390/polym13142238), 2021-07-08
Supplement: s1 [file s1]

## Support Information

For

### Enhanced Bandwidth Broadening of Infrared Reflector Based on polymer Stabilized Cholesteric liquid Crystals with Poly(N- vinylcarbazole) Used as Alignment Layer

Limin Zhang <sup>1,2</sup>, Qiumei Nie <sup>1</sup>, Xiaofang Jiang <sup>3</sup>, Wei Zhao <sup>1,2</sup>, Xiaowen Hu <sup>1,2,\*</sup>,  
Lingling Shui <sup>2</sup>, Guofu Zhou <sup>1,2</sup>

<sup>1</sup> SCNU-TUE Joint Lab of Device Integrated Responsive Materials (DIRM), National Center for International Research on Green Optoelectronics, South China Normal University, Guangzhou 510006, China

<sup>2</sup> Guangdong Provincial Key Laboratory of Optical Information Materials and Technology & Institute of Electronic Paper Displays, South China Academy of Advanced Optoelectronics, South China Normal University, Guangzhou 510006, China

<sup>3</sup> Laboratory of Quantum Engineering and Quantum Material, School of Physics and Telecommunication Engineering, South China Normal University, Guangzhou 510006, China

\* Correspondence: Xiaowen Hu, xwhu@m.scnu.edu.cn

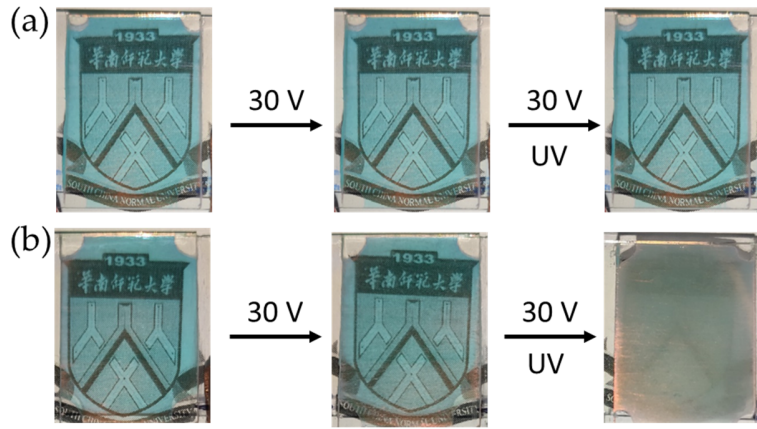

**Fig. S1** For both PVA-PVA-based CLC cell and PVA-PVK-based CLC cell, at applied voltage of 30V, both cells stay in colored and transparent state due to cholesteric texture. When shining UV light with intensity of 10 mW/cm<sup>2</sup> for 60s: (a) the PVA-PVA-based CLC keeps initial state; (b) the PVA-PVK-based CLC cell turns opaque due to focal conic state.

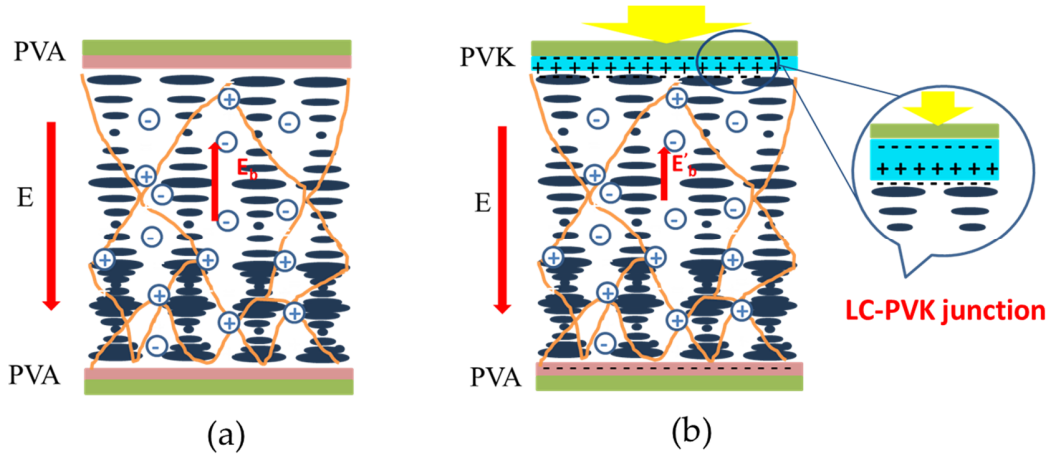

**Fig. S2** In the PVA-PVK cell (b), the generated hole-electron pairs in the PVK layer in the presence of UV light can neutralize the impurity electrons in the LC-PVK junction; therefore, the built-in electric field  $E_b'$  in the PVA-PVK cell is smaller than that ( $E_b$ ) in PVA-PVA cell (a). On application of the same electric field, the effective electric field ( $E_{eff}$ ) in the PVA-PVK cell is larger than that in PVA-PVA cell, which results in enhanced bandwidth broadening.

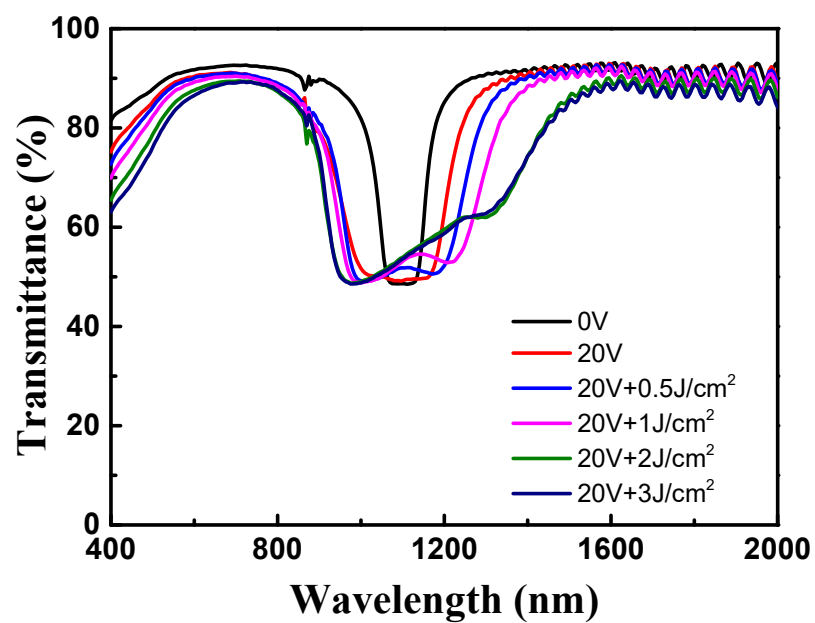

**Fig.S3** The transmission spectra of IR reflector with PVA-PVK alignment layer under extra UV irradiation with different UV dose.
